# Supplementary material for: Theoretical study on the leaching of palladium in a CO atmosphere
Source: Royal Society of Chemistry journal article supplement (doi:10.1039/c2cy20441j), 2012-01-01
Supplement: c2cy20441j.pdf [file c2cy20441j.pdf]

## Electronic Supporting Information

### Theoretical study on the leaching of palladium in a CO atmosphere<sup>†</sup>

Chun-Ran Chang,<sup>1,2</sup> Zhi-Jian Zhao,<sup>2</sup> Klaus Köhler,<sup>2</sup> Alexander Genest,<sup>2</sup>  
Notker Rösch<sup>2,3\*</sup>

- <sup>1</sup> Department of Chemistry and Key Laboratory of Organic Optoelectronics and Molecular Engineering of Ministry of Education, Tsinghua University, Beijing 100084, China
- <sup>2</sup> Department Chemie and Catalysis Research Center, Technische Universität München, 85747 Garching, Germany
- <sup>3</sup> Institute of High Performance Computing, 1 Fusionopolis Way, #16-16 Connexis, Singapore 138632, Singapore

\* Corresponding author. Email: roesch@mytum.de

## S1. The most stable CO adsorption site on investigated models at low coverage

At low coverage (1/12 ML), all possible CO adsorption sites around the Pd atom to be leached out were investigated and Figure S1 just gives the most stable ones for further inspection as listed in Table 1 of the main text.

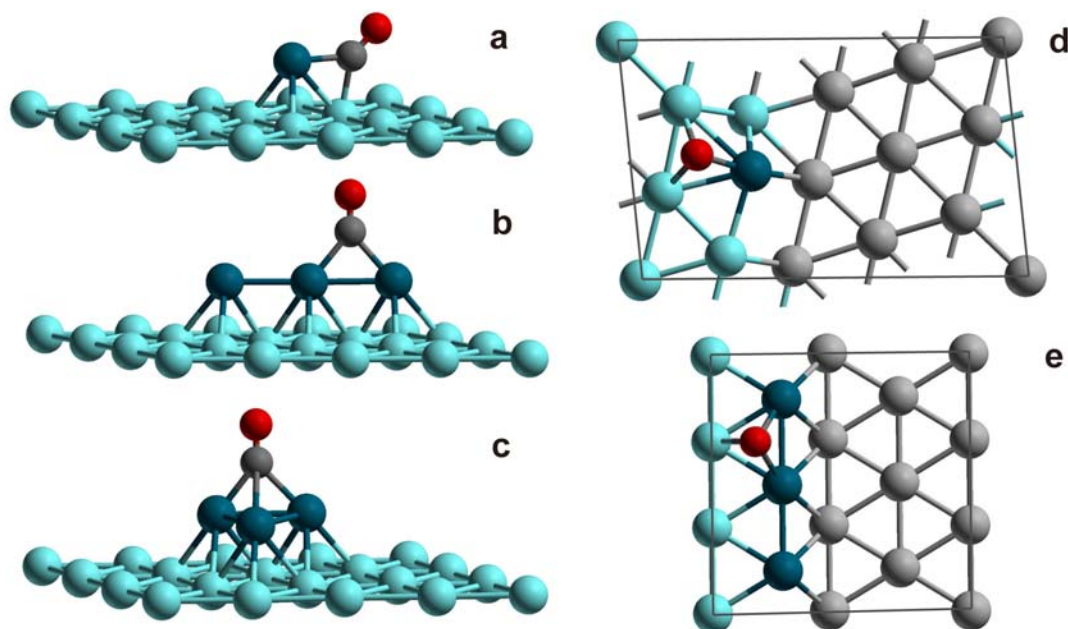

**Figure S1.** The most stable site for one CO adsorption on investigated models: (a) Pd<sub>1</sub>, (b) Pd<sub>3</sub> line, (c) Pd<sub>3</sub> triangle, (d) Pd(865) and (e) Pd(221). Dark blue-colored atoms represent additional atoms on Pd(111), kink atoms of Pd(865) and step atoms of Pd(221). For Pd(865) and Pd(221), upper layer atoms are in light blue and terrace atoms are in gray.

**Table S1** Adsorption energy of CO at the top site of various models (kJ mol<sup>-1</sup>)

| Model                    | $E_{\text{ad}}(\text{CO})$ | Model   | $E_{\text{ad}}(\text{CO})$ |
|--------------------------|----------------------------|---------|----------------------------|
| Pd <sub>1</sub>          | 154                        | Pd(865) | 149                        |
| Pd <sub>3</sub> line     | 156                        | Pd(221) | 148                        |
| Pd <sub>3</sub> triangle | 160                        | Pd(111) | 135                        |

## S2. Selected high coverage models of Pd<sub>1</sub>, Pd<sub>3</sub> line and Pd(865)

Figure S2 gives the visual pictures of high coverage models, corresponding to the models listed in Table 2 of the main text. Taking Pd<sub>1</sub> models for example, T+B (1), T+T and T+B (2) are 9COs-adsorbed cases with two CO directly interacted with the Pd atom to be leached out at top (T) or bridge (B) site. While T+T+B (1) and T+T+B (2) are 10COs-adsorbed cases with three CO directly interacted with the Pd atom to be leached out at T or B site. For Pd<sub>3</sub> line and Pd(865), they also consist of 9COs- and 10COs-adsorbed models and the adsorption rules are the same as Pd<sub>1</sub>. H stands for hollow site.

**Pd<sub>1</sub> high coverage models:**

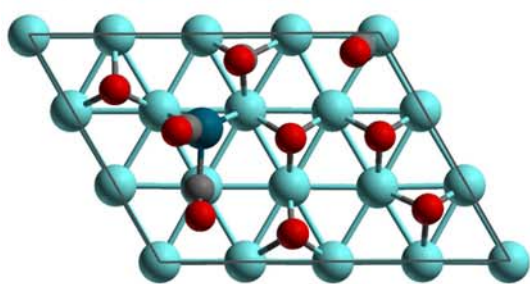

T+B (1)

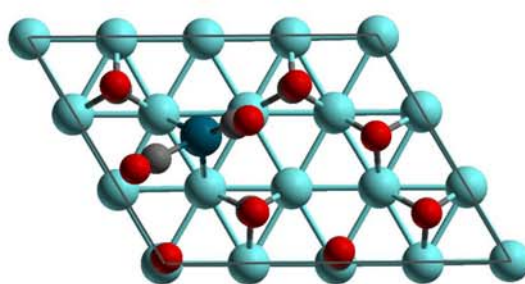

T+T

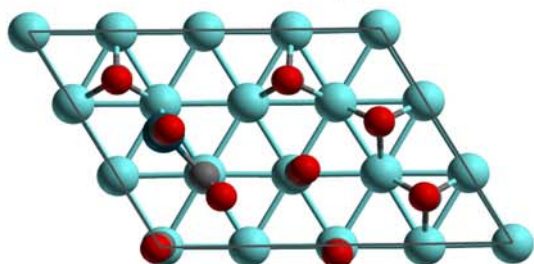

T+B (2)

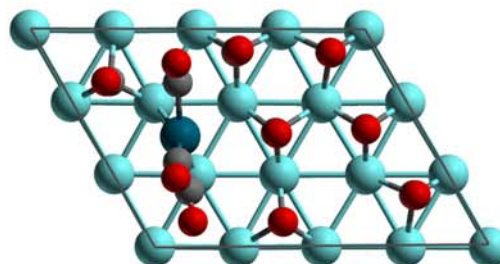

T+T+B (1)

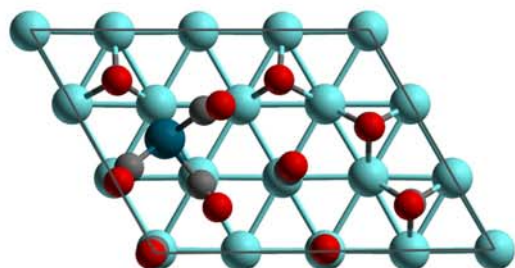

T+T+B (2)

**Pd<sub>3</sub> line high coverage models:**

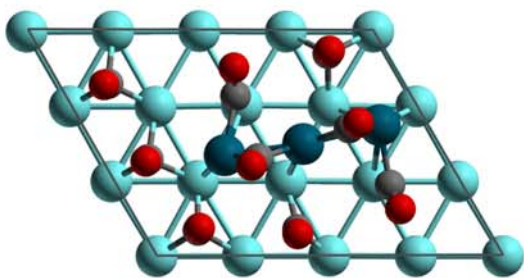

B+B

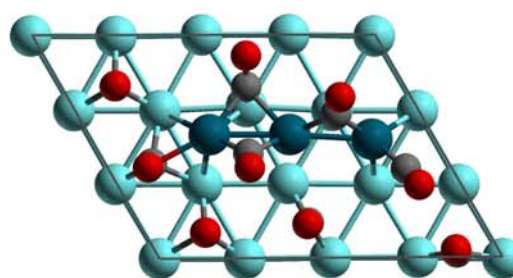

T+B

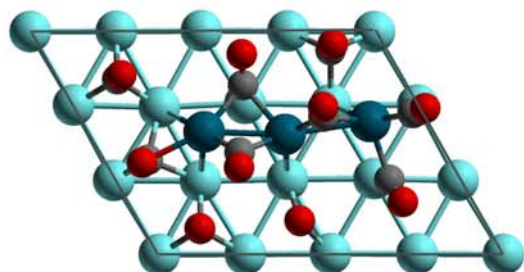

T+B+B

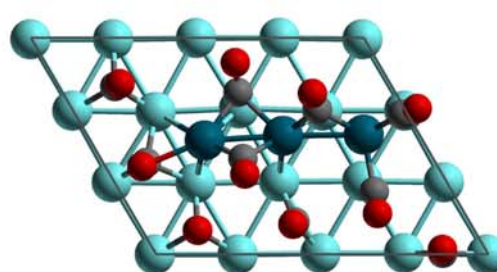

T+T+B

**Pd(865) high coverage models:**

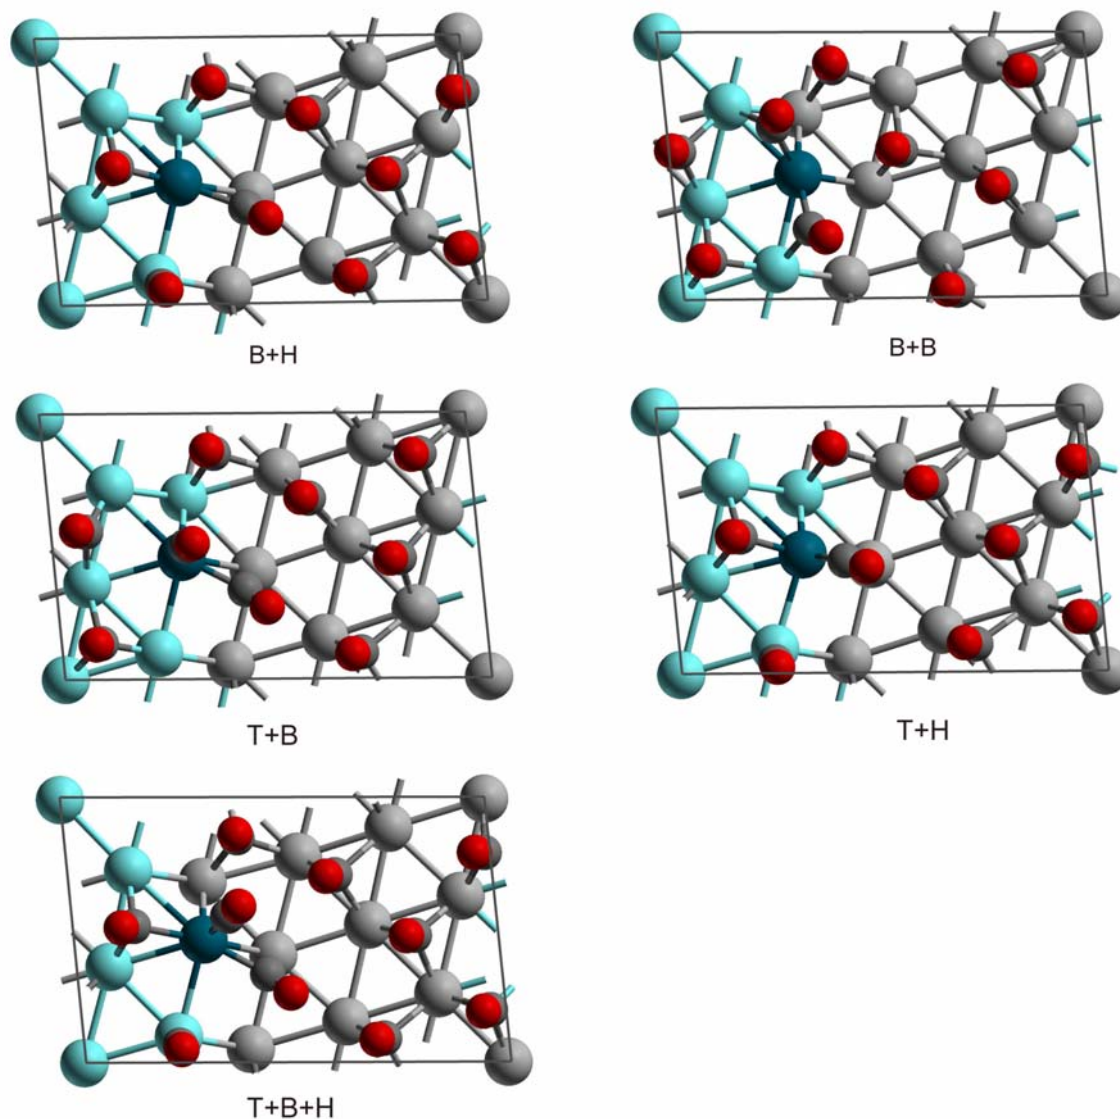

**Figure S2.** High CO coverage models of Pd<sub>1</sub>, Pd<sub>3</sub> line and Pd(865). Different colored atoms are illustrated in the notes of Figure S1.

### S3. Cartesian Coordinates

Here we list the Cartesian coordinates (Å) of the optimized structures listed in Table 1 (depicted in Figure S1) and Table 2 (depicted in Figure S2) of the main text. For each model, the two bottom layers are kept fixed during optimization. Thus, the coordinates of the Pd atoms in the two bottom layers are listed first. In the subsequent tables only the optimized coordinates of the Pd atoms and adsorbates are listed.

#### *Two bottom layers of Pd surfaces*

##### *Two bottom layers of Pd(111)*

|    |          |         |         |    |          |         |         |
|----|----------|---------|---------|----|----------|---------|---------|
| Pd | 0.00000  | 1.61670 | 2.28630 | Pd | 0.00000  | 0.00000 | 0.00000 |
| Pd | 2.80010  | 1.61670 | 2.28630 | Pd | 2.80010  | 0.00000 | 0.00000 |
| Pd | 5.60030  | 1.61670 | 2.28630 | Pd | 5.60030  | 0.00000 | 0.00000 |
| Pd | 8.40040  | 1.61670 | 2.28630 | Pd | 8.40040  | 0.00000 | 0.00000 |
| Pd | -1.40010 | 4.04170 | 2.28630 | Pd | 9.80050  | 2.42500 | 0.00000 |
| Pd | 1.40010  | 4.04170 | 2.28630 | Pd | 1.40010  | 2.42500 | 0.00000 |
| Pd | 4.20020  | 4.04170 | 2.28630 | Pd | 4.20020  | 2.42500 | 0.00000 |
| Pd | 7.00040  | 4.04170 | 2.28630 | Pd | 7.00040  | 2.42500 | 0.00000 |
| Pd | -2.80010 | 6.46670 | 2.28630 | Pd | -2.80010 | 4.85000 | 0.00000 |
| Pd | 0.00000  | 6.46670 | 2.28630 | Pd | 0.00000  | 4.85000 | 0.00000 |
| Pd | 2.80010  | 6.46670 | 2.28630 | Pd | 2.80010  | 4.85000 | 0.00000 |
| Pd | 5.60030  | 6.46670 | 2.28630 | Pd | 5.60030  | 4.85000 | 0.00000 |

##### *Two bottom layers of Pd(221)*

|    |         |         |         |    |         |         |         |
|----|---------|---------|---------|----|---------|---------|---------|
| Pd | 1.40010 | 4.20020 | 2.64000 | Pd | 0.00000 | 5.60030 | 0.66000 |
| Pd | 1.40010 | 0.46670 | 3.96000 | Pd | 0.00000 | 1.86680 | 1.98000 |
| Pd | 0.00000 | 6.53370 | 3.30000 | Pd | 1.40010 | 3.26680 | 0.00000 |
| Pd | 0.00000 | 2.80010 | 4.62000 | Pd | 1.40010 | 7.93370 | 1.32000 |
| Pd | 4.20020 | 4.20020 | 2.64000 | Pd | 2.80010 | 5.60030 | 0.66000 |
| Pd | 4.20020 | 0.46670 | 3.96000 | Pd | 2.80010 | 1.86680 | 1.98000 |
| Pd | 2.80010 | 6.53370 | 3.30000 | Pd | 4.20020 | 3.26680 | 0.00000 |
| Pd | 2.80010 | 2.80010 | 4.62000 | Pd | 4.20020 | 7.93370 | 1.32000 |
| Pd | 7.00040 | 4.20020 | 2.64000 | Pd | 5.60030 | 5.60030 | 0.66000 |
| Pd | 7.00040 | 0.46670 | 3.96000 | Pd | 5.60030 | 1.86680 | 1.98000 |
| Pd | 5.60030 | 6.53370 | 3.30000 | Pd | 7.00040 | 3.26680 | 0.00000 |
| Pd | 5.60030 | 2.80010 | 4.62000 | Pd | 7.00040 | 7.93370 | 1.32000 |

##### *Two bottom layers of Pd(865)*

|    |         |          |         |    |         |          |         |
|----|---------|----------|---------|----|---------|----------|---------|
| Pd | 6.31989 | 1.97168  | 3.36484 | Pd | 6.31989 | 11.24856 | 0.53129 |
| Pd | 1.02812 | 3.77026  | 3.71903 | Pd | 2.61565 | 0.31509  | 0.70839 |
| Pd | 3.14483 | 10.20728 | 2.65645 | Pd | 6.84907 | 3.91225  | 1.41677 |



|    |         |          |         |    |         |          |         |
|----|---------|----------|---------|----|---------|----------|---------|
| Pd | 3.67400 | 2.87097  | 3.54193 | Pd | 1.55729 | 5.71083  | 1.77097 |
| Pd | 5.79071 | 9.30799  | 2.47935 | Pd | 4.73236 | 2.11367  | 1.06258 |
| Pd | 1.55729 | 1.07239  | 3.18774 | Pd | 6.84907 | 8.55069  | 0.00000 |
| Pd | 3.67400 | 7.50941  | 2.12516 | Pd | 1.55729 | 10.34927 | 0.35419 |
| Pd | 5.79071 | 4.66955  | 3.89612 | Pd | 7.37824 | 1.21438  | 0.88548 |
| Pd | 7.90742 | 11.10657 | 2.83355 | Pd | 2.08647 | 3.01296  | 1.23968 |
| Pd | 4.20318 | 0.17310  | 3.01064 | Pd | 4.20318 | 9.44998  | 0.17710 |
| Pd | 1.02812 | 8.40870  | 2.30226 | Pd | 6.31989 | 6.61012  | 1.94806 |
| Pd | 3.14482 | 5.56884  | 4.07322 | Pd | 6.31989 | 11.24856 | 0.53129 |

***Cartesian Coordinates of low coverage models (Table 1 of the text):***

*Pd<sub>1</sub>\_Bridge*

|    |          |         |         |    |          |         |         |
|----|----------|---------|---------|----|----------|---------|---------|
| C  | 4.13926  | 2.52368 | 8.97297 | Pd | 5.68440  | 4.84648 | 6.80345 |
| O  | 4.09361  | 1.82513 | 9.92608 | Pd | 1.38844  | 0.79324 | 4.54982 |
| Pd | 4.18461  | 4.49071 | 8.94809 | Pd | 4.19351  | 0.81201 | 4.59518 |
| Pd | 7.00388  | 7.25981 | 6.84681 | Pd | 7.00235  | 0.78537 | 4.56314 |
| Pd | -1.42252 | 7.24105 | 6.84492 | Pd | 9.79150  | 0.78746 | 4.55901 |
| Pd | 1.37761  | 7.25078 | 6.84893 | Pd | -0.00642 | 3.22202 | 4.55056 |
| Pd | 4.19245  | 7.21366 | 6.88277 | Pd | 2.80420  | 3.20242 | 4.57477 |
| Pd | 9.78405  | 2.37933 | 6.84513 | Pd | 5.58409  | 3.19609 | 4.58074 |
| Pd | 1.35683  | 2.39613 | 6.84287 | Pd | 8.39227  | 3.21619 | 4.55142 |
| Pd | 4.18594  | 2.38986 | 7.01468 | Pd | -1.40642 | 5.65309 | 4.54705 |
| Pd | 7.02034  | 2.38031 | 6.85034 | Pd | 1.39028  | 5.64891 | 4.54736 |
| Pd | 8.41737  | 4.81152 | 6.84905 | Pd | 4.19533  | 5.63872 | 4.55743 |
| Pd | -0.04458 | 4.82466 | 6.84739 | Pd | 6.99599  | 5.63824 | 4.55140 |
| Pd | 2.69651  | 4.84415 | 6.79602 |    |          |         |         |

*Pd<sub>3</sub> line\_Bridge*

|    |          |         |          |    |          |         |         |
|----|----------|---------|----------|----|----------|---------|---------|
| C  | 5.55703  | 3.72782 | 10.37972 | Pd | 2.80829  | 4.89690 | 6.78380 |
| O  | 5.58842  | 3.49983 | 11.53632 | Pd | 5.58645  | 4.89745 | 6.78411 |
| Pd | 1.49139  | 3.95252 | 8.87641  | Pd | 1.39879  | 0.80431 | 4.57425 |
| Pd | 4.16210  | 4.04522 | 9.00714  | Pd | 4.19287  | 0.81331 | 4.57652 |
| Pd | 6.90263  | 4.09456 | 8.96834  | Pd | 6.99540  | 0.80830 | 4.56956 |
| Pd | 7.00387  | 7.25130 | 6.88202  | Pd | 9.80315  | 0.80382 | 4.57201 |
| Pd | -1.40749 | 7.23538 | 6.87476  | Pd | -0.00573 | 3.22644 | 4.56187 |
| Pd | 1.38552  | 7.24381 | 6.87000  | Pd | 2.79403  | 3.22847 | 4.55524 |
| Pd | 8.40580  | 0.02075 | 6.87162  | Pd | 5.59634  | 3.22632 | 4.55155 |
| Pd | -1.39569 | 2.42249 | 6.88383  | Pd | 8.40026  | 3.22466 | 4.57092 |
| Pd | 1.39959  | 2.33507 | 6.84028  | Pd | -1.39528 | 5.65414 | 4.56428 |
| Pd | 4.19047  | 2.37354 | 6.87155  | Pd | 1.37877  | 5.66624 | 4.54159 |
| Pd | 6.98735  | 2.37445 | 6.86216  | Pd | 4.19232  | 5.66574 | 4.54854 |

|    |          |         |         |    |         |         |         |
|----|----------|---------|---------|----|---------|---------|---------|
| Pd | -2.77736 | 4.83619 | 6.87016 | Pd | 7.01092 | 5.65792 | 4.55514 |
| Pd | -0.02943 | 4.84936 | 6.86082 |    |         |         |         |

*Pd<sub>3</sub> triangle\_ Hollow*

|    |          |         |          |    |          |         |         |
|----|----------|---------|----------|----|----------|---------|---------|
| C  | 2.81456  | 3.23402 | 10.25906 | Pd | 2.80359  | 4.89653 | 6.80667 |
| O  | 2.81617  | 3.22771 | 11.45515 | Pd | 5.65191  | 4.87733 | 6.86052 |
| Pd | 1.42053  | 4.04629 | 8.98534  | Pd | 1.39927  | 0.80430 | 4.56018 |
| Pd | 4.20702  | 4.04235 | 8.98240  | Pd | 4.20034  | 0.79915 | 4.56643 |
| Pd | 2.80986  | 1.62901 | 8.97775  | Pd | 6.99608  | 0.80180 | 4.57542 |
| Pd | 7.00010  | 7.26709 | 6.87635  | Pd | 9.79766  | 0.80387 | 4.56778 |
| Pd | -1.41322 | 7.22446 | 6.85837  | Pd | -0.00988 | 3.22869 | 4.56018 |
| Pd | 1.38588  | 7.26071 | 6.89321  | Pd | 2.79853  | 3.23037 | 4.54287 |
| Pd | 8.40754  | 0.00529 | 6.87827  | Pd | 5.60698  | 3.23563 | 4.56032 |
| Pd | 9.77474  | 2.41530 | 6.87366  | Pd | 8.39569  | 3.22664 | 4.56418 |
| Pd | 1.34754  | 2.39611 | 6.80904  | Pd | -1.40975 | 5.64914 | 4.54718 |
| Pd | 4.25021  | 2.40123 | 6.80502  | Pd | 1.39042  | 5.65713 | 4.56872 |
| Pd | 7.01083  | 2.42197 | 6.87613  | Pd | 4.20468  | 5.66043 | 4.56280 |
| Pd | 8.39383  | 4.83915 | 6.86738  | Pd | 7.01011  | 5.66575 | 4.55633 |
| Pd | -0.05676 | 4.84847 | 6.86384  |    |          |         |         |

*Pd(865)\_ Hollow*

|    |         |          |          |    |         |          |         |
|----|---------|----------|----------|----|---------|----------|---------|
| C  | 3.65790 | 1.72447  | 9.27170  | Pd | 8.44399 | 11.67805 | 7.56556 |
| O  | 3.66078 | 1.55672  | 10.45274 | Pd | 3.14957 | 0.93277  | 5.47268 |
| Pd | 4.25100 | 3.41319  | 8.24520  | Pd | 5.26396 | 7.35695  | 4.43695 |
| Pd | 2.09235 | 6.34902  | 6.59785  | Pd | 7.37359 | 4.56673  | 6.28717 |
| Pd | 6.30072 | 9.89987  | 7.25122  | Pd | 5.78885 | 0.03273  | 5.29736 |
| Pd | 4.73695 | 5.44723  | 6.44442  | Pd | 0.52707 | 1.84230  | 5.62452 |
| Pd | 6.88470 | 2.52147  | 8.01703  | Pd | 7.90685 | 6.45232  | 4.28000 |
| Pd | 3.66593 | 10.75074 | 7.40351  | Pd | 2.60742 | 8.25422  | 4.59594 |
| Pd | 4.73710 | 0.70638  | 7.82142  | Pd | 2.57877 | 3.68060  | 6.06193 |
| Pd | 6.84818 | 7.23187  | 6.75841  | Pd | 4.73325 | 10.05307 | 4.92682 |
| Pd | 1.53769 | 9.01583  | 7.08377  | Pd | 5.26379 | 2.74707  | 5.79448 |
| Pd | 2.06474 | 1.63055  | 7.96286  | Pd | 7.37266 | 9.16049  | 4.77347 |
| Pd | 4.19475 | 8.11102  | 6.90835  | Pd | 2.08973 | 10.95275 | 5.10081 |

*Pd(221)\_ Hollow*

|    |         |         |          |    |         |         |         |
|----|---------|---------|----------|----|---------|---------|---------|
| C  | 4.21205 | 3.55863 | 10.90564 | Pd | 5.63388 | 4.60285 | 9.84665 |
| O  | 4.22704 | 3.32382 | 12.07559 | Pd | 8.40255 | 7.46192 | 5.91991 |
| Pd | 2.77436 | 4.59635 | 9.85478  | Pd | 8.40232 | 3.74382 | 7.18317 |
| Pd | 8.40259 | 8.37534 | 8.56608  | Pd | 1.40383 | 5.15077 | 5.25913 |
| Pd | 1.40403 | 6.10517 | 7.96074  | Pd | 1.40024 | 1.38594 | 6.56797 |

|    |         |         |         |    |         |         |         |
|----|---------|---------|---------|----|---------|---------|---------|
| Pd | 1.37952 | 2.26043 | 9.17967 | Pd | 2.80202 | 7.46422 | 5.94835 |
| Pd | 0.00101 | 4.56416 | 9.73507 | Pd | 2.79970 | 3.75842 | 7.23243 |
| Pd | 2.79676 | 0.00186 | 8.59656 | Pd | 4.19949 | 5.14816 | 5.27245 |
| Pd | 4.19971 | 6.12470 | 7.98177 | Pd | 4.19906 | 1.40840 | 6.60845 |
| Pd | 4.20182 | 2.26093 | 9.29218 | Pd | 5.59777 | 7.46405 | 5.94834 |
| Pd | 5.60279 | 0.00152 | 8.59519 | Pd | 5.59996 | 3.75793 | 7.22851 |
| Pd | 6.99893 | 6.10581 | 7.95750 | Pd | 6.99747 | 5.15158 | 5.25708 |
| Pd | 7.02205 | 2.26133 | 9.17877 | Pd | 6.99983 | 1.38625 | 6.56790 |

*Pd(111)\_Hollow*

|    |          |         |         |    |          |         |         |
|----|----------|---------|---------|----|----------|---------|---------|
| C  | 4.20198  | 4.03079 | 8.21125 | Pd | 5.61704  | 4.85148 | 6.93773 |
| O  | 4.20367  | 4.02803 | 9.40228 | Pd | 1.39484  | 0.79702 | 4.55003 |
| Pd | 6.99789  | 7.26682 | 6.84794 | Pd | 4.20237  | 0.81566 | 4.57384 |
| Pd | -1.40575 | 7.26146 | 6.84804 | Pd | 7.00470  | 0.80622 | 4.54768 |
| Pd | 1.40650  | 7.27279 | 6.84815 | Pd | 9.79970  | 0.80421 | 4.55208 |
| Pd | 4.20416  | 7.29742 | 6.84528 | Pd | 0.00113  | 3.23254 | 4.54774 |
| Pd | 9.80631  | 2.42799 | 6.83878 | Pd | 2.80100  | 3.22881 | 4.57885 |
| Pd | 1.36900  | 2.40310 | 6.83963 | Pd | 5.59678  | 3.22930 | 4.57782 |
| Pd | 4.19672  | 2.39683 | 6.93690 | Pd | 8.40325  | 3.23331 | 4.54811 |
| Pd | 7.02995  | 2.40891 | 6.83966 | Pd | -1.39689 | 5.66066 | 4.54965 |
| Pd | 8.40057  | 4.83989 | 6.84356 | Pd | 1.41447  | 5.65271 | 4.57283 |
| Pd | 0.00081  | 4.84893 | 6.84379 | Pd | 4.19898  | 5.65188 | 4.57873 |
| Pd | 2.78472  | 4.84975 | 6.93973 | Pd | 6.98490  | 5.64553 | 4.57559 |

*Cartesian Coordinates of high coverage models (Table 2 of the text):*

*Pd<sub>1</sub>T+B (1)*

|   |          |         |          |    |          |         |         |
|---|----------|---------|----------|----|----------|---------|---------|
| C | 2.30495  | 1.83968 | 11.26856 | Pd | 8.46653  | 0.01442 | 6.94333 |
| C | -1.49404 | 7.18519 | 9.06385  | Pd | -1.37992 | 2.45201 | 6.88221 |
| C | 7.89565  | 4.46414 | 8.70422  | Pd | 1.37660  | 2.41952 | 6.92154 |
| C | 0.02149  | 3.10788 | 8.28924  | Pd | 4.20152  | 2.41871 | 6.98647 |
| C | 8.50701  | 1.61252 | 8.28505  | Pd | 7.02449  | 2.39481 | 6.95456 |
| C | 5.81686  | 6.52985 | 8.26601  | Pd | -2.79749 | 4.84618 | 6.90902 |
| C | 1.48650  | 5.74124 | 8.32040  | Pd | 0.03044  | 4.85001 | 7.02311 |
| C | 4.08121  | 4.08356 | 8.25001  | Pd | 2.78716  | 4.87228 | 6.86997 |
| C | 5.63528  | 1.54629 | 8.28534  | Pd | 5.58588  | 4.85422 | 6.98715 |
| O | 1.98768  | 1.76918 | 12.36765 | Pd | 1.41174  | 0.79761 | 4.59617 |
| O | -1.45948 | 6.31446 | 9.85627  | Pd | 4.18556  | 0.80542 | 4.60184 |
| O | 7.70650  | 4.31050 | 9.83043  | Pd | 7.00696  | 0.79894 | 4.56859 |
| O | -0.01356 | 3.10754 | 9.47466  | Pd | 9.81298  | 0.81423 | 4.53970 |
| O | 8.51320  | 1.59933 | 9.46331  | Pd | 0.00220  | 3.24408 | 4.57142 |
| O | 5.85510  | 6.55255 | 9.44732  | Pd | 2.80875  | 3.22115 | 4.58584 |



|    |         |          |         |    |          |         |         |
|----|---------|----------|---------|----|----------|---------|---------|
| O  | 1.53621 | 5.74807  | 9.49796 | Pd | 5.60092  | 3.22463 | 4.60034 |
| O  | 3.98866 | 4.03871  | 9.44638 | Pd | 8.39029  | 3.22716 | 4.56760 |
| O  | 5.65212 | 1.54282  | 9.47040 | Pd | -1.41496 | 5.66111 | 4.67723 |
| Pd | 2.79943 | 1.86522  | 9.35688 | Pd | 1.38802  | 5.65818 | 4.56896 |
| Pd | 0.04282 | -0.01093 | 6.84686 | Pd | 4.20999  | 5.66510 | 4.56669 |
| Pd | 2.78404 | 0.00497  | 7.06881 | Pd | 6.99160  | 5.63567 | 4.56389 |
| Pd | 1.39551 | 7.26426  | 6.89914 |    |          |         |         |

*Pd<sub>1</sub>-T+T*

|    |          |         |          |    |          |         |         |
|----|----------|---------|----------|----|----------|---------|---------|
| C  | 3.82390  | 2.07008 | 10.83601 | Pd | 8.44224  | 0.00564 | 6.96978 |
| C  | 1.26260  | 0.97220 | 10.30522 | Pd | -1.38869 | 2.43168 | 6.94041 |
| C  | -2.66414 | 5.01895 | 8.77100  | Pd | 1.37811  | 2.40782 | 6.96934 |
| C  | 0.11096  | 6.55303 | 8.22299  | Pd | 4.23689  | 2.43748 | 7.06493 |
| C  | 8.34963  | 1.64723 | 8.30110  | Pd | 7.01692  | 2.41649 | 6.89432 |
| C  | 5.67640  | 3.21116 | 8.29605  | Pd | -2.76559 | 4.87336 | 6.88612 |
| C  | 0.02239  | 3.24235 | 8.27503  | Pd | 0.02858  | 4.84730 | 6.89702 |
| C  | 5.76258  | 6.44191 | 8.25131  | Pd | 2.82577  | 4.83350 | 6.94190 |
| C  | 2.89807  | 5.08347 | 8.81657  | Pd | 5.62785  | 4.83800 | 6.89662 |
| O  | 0.58606  | 0.64039 | 11.17227 | Pd | 1.42354  | 0.80908 | 4.61589 |
| O  | 4.24414  | 2.17541 | 11.89915 | Pd | 4.20649  | 0.82838 | 4.58123 |
| O  | -2.60283 | 5.04923 | 9.91990  | Pd | 7.02137  | 0.79876 | 4.57840 |
| O  | 0.20256  | 6.49384 | 9.40922  | Pd | 9.81968  | 0.81024 | 4.56522 |
| O  | 8.34895  | 1.65741 | 9.48129  | Pd | 0.02116  | 3.22044 | 4.58067 |
| O  | 5.80253  | 3.31443 | 9.47082  | Pd | 2.82063  | 3.24293 | 4.64474 |
| O  | -0.03237 | 3.33551 | 9.45812  | Pd | 5.60436  | 3.22296 | 4.59221 |
| O  | 5.76236  | 6.41734 | 9.43557  | Pd | 8.41519  | 3.24519 | 4.57447 |
| O  | 2.94924  | 5.20889 | 9.96071  | Pd | -1.38317 | 5.66925 | 4.56784 |
| Pd | 2.72037  | 1.70145 | 9.22872  | Pd | 1.42154  | 5.64470 | 4.55510 |
| Pd | -4.15411 | 7.26642 | 6.91343  | Pd | 4.21021  | 5.66625 | 4.58563 |
| Pd | 2.84481  | 0.02032 | 6.96124  | Pd | 7.01999  | 5.65228 | 4.55815 |
| Pd | 1.42624  | 7.27151 | 6.85691  |    |          |         |         |

*Pd<sub>1</sub>-T+B (2)*

|   |          |         |          |    |          |         |         |
|---|----------|---------|----------|----|----------|---------|---------|
| C | 1.71284  | 1.41867 | 11.33326 | Pd | 8.43926  | 0.03460 | 6.96789 |
| C | -1.33328 | 7.21678 | 9.08179  | Pd | -1.39416 | 2.45984 | 6.85798 |
| C | 8.28840  | 4.75288 | 8.80063  | Pd | 1.39537  | 2.44113 | 6.83845 |
| C | 5.91747  | 0.04215 | 8.78464  | Pd | 4.20222  | 2.44900 | 6.93506 |
| C | 8.44749  | 1.71611 | 8.26919  | Pd | 6.99906  | 2.44441 | 6.91704 |
| C | 5.54751  | 3.16294 | 8.28767  | Pd | -2.78445 | 4.89080 | 6.91368 |
| C | 0.05645  | 3.26766 | 8.13071  | Pd | -0.00125 | 4.87108 | 6.90279 |
| C | 5.71566  | 6.45468 | 8.28320  | Pd | 2.79907  | 4.86694 | 6.91994 |
| C | 2.88642  | 4.60746 | 8.79200  | Pd | 5.60427  | 4.84913 | 6.93968 |
| O | 1.89425  | 1.45382 | 12.46517 | Pd | 1.40486  | 0.79663 | 4.60034 |

|    |          |         |         |    |          |         |         |
|----|----------|---------|---------|----|----------|---------|---------|
| O  | -0.76425 | 6.49570 | 9.82561 | Pd | 4.19867  | 0.79334 | 4.62957 |
| O  | 8.18357  | 4.64384 | 9.94068 | Pd | 7.00425  | 0.80601 | 4.58086 |
| O  | 6.11079  | 0.11727 | 9.91757 | Pd | 9.80689  | 0.80558 | 4.55401 |
| O  | 8.48535  | 1.74220 | 9.44976 | Pd | -0.00385 | 3.24739 | 4.53847 |
| O  | 5.54579  | 3.14610 | 9.47239 | Pd | 2.81176  | 3.23530 | 4.56463 |
| O  | 0.10383  | 3.19535 | 9.34484 | Pd | 5.60144  | 3.23587 | 4.57725 |
| O  | 5.70257  | 6.44610 | 9.46918 | Pd | 8.39260  | 3.25271 | 4.55495 |
| O  | 2.93425  | 4.51364 | 9.94018 | Pd | -1.40978 | 5.68385 | 4.62344 |
| Pd | 1.58670  | 1.40092 | 9.36997 | Pd | 1.40806  | 5.66177 | 4.59279 |
| Pd | 0.02363  | 0.01413 | 6.95931 | Pd | 4.19629  | 5.66927 | 4.59658 |
| Pd | 2.80479  | 0.04378 | 7.08735 | Pd | 7.00336  | 5.66248 | 4.57831 |
| Pd | 5.59546  | 0.01836 | 6.92018 |    |          |         |         |

*Pd<sub>1</sub>T+T+B (1)*

|    |          |         |          |    |          |         |         |
|----|----------|---------|----------|----|----------|---------|---------|
| C  | 2.16329  | 3.18993 | 10.71056 | Pd | 5.61971  | 0.01319 | 6.90797 |
| C  | 2.15807  | 0.53470 | 11.51829 | Pd | 8.49679  | 0.02502 | 6.96165 |
| C  | -1.62239 | 6.79886 | 8.96051  | Pd | -1.37181 | 2.44982 | 6.86735 |
| C  | 7.29508  | 4.15909 | 8.28560  | Pd | 1.40638  | 2.42013 | 7.11474 |
| C  | -0.07944 | 3.17040 | 8.30876  | Pd | 4.20162  | 2.45283 | 7.05010 |
| C  | 8.49696  | 1.60434 | 8.30694  | Pd | 7.02406  | 2.42858 | 6.99883 |
| C  | 5.90596  | 6.65350 | 8.27870  | Pd | -2.75231 | 4.86332 | 6.80659 |
| C  | 1.51288  | 5.74426 | 8.30339  | Pd | 0.07028  | 4.85080 | 6.97031 |
| C  | 4.14279  | 4.16861 | 8.31567  | Pd | 2.83319  | 4.88339 | 6.91090 |
| C  | 5.47201  | 1.46850 | 8.36008  | Pd | 5.65681  | 4.88142 | 6.97350 |
| O  | 2.10451  | 3.86457 | 11.63401 | Pd | 1.43718  | 0.82336 | 4.60493 |
| O  | 2.08499  | 0.03197 | 12.54433 | Pd | 4.20407  | 0.82503 | 4.62199 |
| O  | -1.50560 | 5.76907 | 9.52745  | Pd | 7.02605  | 0.81691 | 4.58979 |
| O  | 7.31450  | 4.17574 | 9.46124  | Pd | 9.82395  | 0.82129 | 4.53429 |
| O  | -0.23053 | 3.19455 | 9.48614  | Pd | 0.04173  | 3.23768 | 4.59330 |
| O  | 8.49619  | 1.60083 | 9.48366  | Pd | 2.82279  | 3.22819 | 4.62975 |
| O  | 5.96712  | 6.67190 | 9.45619  | Pd | 5.61033  | 3.23220 | 4.59975 |
| O  | 1.52422  | 5.76305 | 9.48412  | Pd | 8.40986  | 3.22901 | 4.54527 |
| O  | 4.22421  | 4.24859 | 9.49251  | Pd | -1.36370 | 5.67987 | 4.61569 |
| O  | 5.50956  | 1.46259 | 9.53912  | Pd | 1.42887  | 5.67131 | 4.58079 |
| Pd | 2.25989  | 1.36691 | 9.72169  | Pd | 4.22794  | 5.67169 | 4.58413 |
| Pd | 0.08240  | 0.02422 | 6.81304  | Pd | 7.01100  | 5.65697 | 4.52941 |
| Pd | 2.80915  | 0.02042 | 7.05627  |    |          |         |         |

*Pd<sub>1</sub>T+T+B (2)*

|   |          |         |          |    |          |         |         |
|---|----------|---------|----------|----|----------|---------|---------|
| C | 2.97869  | 2.22387 | 10.86621 | Pd | 5.58612  | 0.00050 | 6.92229 |
| C | 0.49540  | 0.32936 | 10.93699 | Pd | 8.42237  | 0.02708 | 6.93738 |
| C | -1.31361 | 7.04115 | 9.08112  | Pd | -1.38891 | 2.44076 | 6.88867 |
| C | 8.23114  | 4.66909 | 8.79050  | Pd | 1.39742  | 2.41002 | 6.90635 |

|    |          |         |          |    |          |         |         |
|----|----------|---------|----------|----|----------|---------|---------|
| C  | 5.79350  | 0.22686 | 8.78831  | Pd | 4.19044  | 2.42256 | 6.92342 |
| C  | 8.45136  | 1.68571 | 8.27508  | Pd | 6.98979  | 2.43687 | 6.94680 |
| C  | 5.48042  | 3.23126 | 8.26617  | Pd | -2.78698 | 4.86637 | 6.91618 |
| C  | 0.07790  | 3.24507 | 8.19501  | Pd | 0.00370  | 4.83216 | 6.91069 |
| C  | 5.64836  | 6.40907 | 8.24625  | Pd | 2.79134  | 4.84910 | 6.88587 |
| C  | 2.79097  | 4.85427 | 8.77098  | Pd | 5.58706  | 4.83237 | 6.87648 |
| O  | 3.53263  | 2.39598 | 11.85698 | Pd | 1.40275  | 0.79195 | 4.62361 |
| O  | -4.04033 | 7.13139 | 11.92711 | Pd | 4.17953  | 0.78780 | 4.62234 |
| O  | -0.77419 | 6.28356 | 9.80807  | Pd | 6.99429  | 0.80693 | 4.58108 |
| O  | 8.10777  | 4.54211 | 9.92749  | Pd | 9.80986  | 0.80175 | 4.55867 |
| O  | 5.92423  | 0.38568 | 9.92166  | Pd | -0.00402 | 3.23331 | 4.55536 |
| O  | 8.48684  | 1.68545 | 9.45693  | Pd | 2.79727  | 3.23267 | 4.57629 |
| O  | 5.46184  | 3.25376 | 9.45150  | Pd | 5.59613  | 3.22315 | 4.56915 |
| O  | 0.10611  | 3.21484 | 9.40114  | Pd | 8.39260  | 3.23930 | 4.56335 |
| O  | 5.57087  | 6.35312 | 9.42946  | Pd | -1.41554 | 5.67129 | 4.63480 |
| O  | 2.80396  | 4.90366 | 9.92241  | Pd | 1.39101  | 5.66544 | 4.58966 |
| Pd | 1.68351  | 1.28894 | 9.58840  | Pd | 4.18713  | 5.66836 | 4.57284 |
| Pd | -4.18935 | 7.25920 | 6.98448  | Pd | 7.00469  | 5.65962 | 4.57248 |
| Pd | 2.79368  | 0.01290 | 7.10769  |    |          |         |         |

*Pd<sub>3</sub> line\_B+B*

|    |          |         |          |    |          |         |         |
|----|----------|---------|----------|----|----------|---------|---------|
| C  | 3.29710  | 3.18623 | 11.22621 | Pd | 5.58435  | 0.03442 | 6.82851 |
| C  | 2.55937  | 5.21350 | 9.01641  | Pd | 8.38698  | 0.01933 | 6.84491 |
| C  | 6.22973  | 4.16961 | 11.14326 | Pd | 9.74804  | 2.43976 | 6.80574 |
| C  | 7.55211  | 2.32644 | 8.91781  | Pd | 1.33395  | 2.45368 | 6.93363 |
| C  | -0.25985 | 3.15613 | 8.23470  | Pd | 4.18777  | 2.46063 | 7.11770 |
| C  | 5.54109  | 6.58082 | 8.20289  | Pd | 7.00406  | 2.43710 | 7.01225 |
| C  | 4.56851  | 0.88934 | 8.32606  | Pd | -2.79757 | 4.87157 | 6.84131 |
| C  | 1.34424  | 0.85355 | 8.24643  | Pd | -0.02663 | 4.86195 | 7.02556 |
| C  | -1.56329 | 5.60543 | 8.26380  | Pd | 2.76634  | 4.90808 | 7.06241 |
| O  | 3.06903  | 2.95531 | 12.34402 | Pd | 5.56697  | 4.88531 | 7.01702 |
| O  | 2.50616  | 6.12252 | 9.76412  | Pd | 1.40182  | 0.82362 | 4.55937 |
| O  | 6.52539  | 4.34527 | 12.25539 | Pd | 4.18403  | 0.84226 | 4.57717 |
| O  | 7.88654  | 1.54837 | 9.73460  | Pd | 7.00205  | 0.82961 | 4.58231 |
| O  | -0.34197 | 3.08977 | 9.42894  | Pd | 9.79476  | 0.80586 | 4.53149 |
| O  | 5.59922  | 6.67251 | 9.39215  | Pd | 0.00344  | 3.25597 | 4.54624 |
| O  | 4.57054  | 0.74006 | 9.50192  | Pd | 2.80457  | 3.24488 | 4.66260 |
| O  | 1.39767  | 0.92838 | 9.44198  | Pd | 5.59073  | 3.23646 | 4.67175 |
| O  | -1.69287 | 5.57111 | 9.45212  | Pd | 8.37265  | 3.24274 | 4.54856 |
| Pd | 2.20882  | 3.28887 | 9.41859  | Pd | -1.39399 | 5.67611 | 4.55881 |
| Pd | 4.74531  | 3.65292 | 9.89137  | Pd | 1.40182  | 5.65425 | 4.61746 |
| Pd | 7.22144  | 4.26383 | 9.25587  | Pd | 4.17663  | 5.63447 | 4.60069 |
| Pd | 0.00765  | 0.01929 | 6.87316  | Pd | 6.96884  | 5.65131 | 4.56837 |
| Pd | 2.80028  | 0.02315 | 6.97573  |    |          |         |         |

*Pd<sub>3</sub> line\_T+B*

|    |          |         |          |    |          |         |         |
|----|----------|---------|----------|----|----------|---------|---------|
| C  | 2.90932  | 3.43405 | 10.91863 | Pd | 5.58067  | 0.03404 | 6.82950 |
| C  | 2.83724  | 5.61715 | 8.90229  | Pd | 8.42543  | 0.04478 | 6.82006 |
| C  | 5.76137  | 4.73497 | 10.58426 | Pd | 9.77271  | 2.42752 | 6.82711 |
| C  | 8.04239  | 2.94730 | 10.40917 | Pd | 1.39839  | 2.43218 | 6.99541 |
| C  | -0.23368 | 3.10951 | 8.25603  | Pd | 4.20451  | 2.45533 | 6.93085 |
| C  | 9.70539  | 0.20409 | 8.33118  | Pd | 7.00810  | 2.43343 | 6.78547 |
| C  | 4.88115  | 1.17994 | 8.30760  | Pd | -2.77786 | 4.83814 | 6.96875 |
| C  | 1.50093  | 0.84988 | 8.32314  | Pd | 0.02160  | 4.83565 | 7.05591 |
| C  | -1.44901 | 5.62917 | 8.31688  | Pd | 2.84430  | 4.96699 | 6.98465 |
| O  | 2.95636  | 2.97730 | 11.98494 | Pd | 5.63229  | 4.84133 | 6.90581 |
| O  | 2.82934  | 6.62936 | 9.52997  | Pd | 1.40022  | 0.81355 | 4.58414 |
| O  | 5.90133  | 5.27658 | 11.60782 | Pd | 4.17471  | 0.81502 | 4.55528 |
| O  | 8.47690  | 2.41541 | 11.32977 | Pd | 7.00968  | 0.79441 | 4.53850 |
| O  | -0.36326 | 2.97807 | 9.45827  | Pd | 9.82272  | 0.80402 | 4.52836 |
| O  | 9.68083  | 0.30436 | 9.50094  | Pd | 0.02310  | 3.24827 | 4.56553 |
| O  | 4.83734  | 1.13082 | 9.48780  | Pd | 2.79280  | 3.24966 | 4.64594 |
| O  | 1.51893  | 0.85134 | 9.50478  | Pd | 5.58563  | 3.23390 | 4.55307 |
| O  | -1.42099 | 5.65250 | 9.50260  | Pd | 8.40759  | 3.24836 | 4.55065 |
| Pd | 1.63462  | 4.04908 | 9.41009  | Pd | -1.38616 | 5.65348 | 4.59184 |
| Pd | 4.25766  | 4.05399 | 9.37977  | Pd | 1.40197  | 5.65145 | 4.61682 |
| Pd | 6.93732  | 3.90421 | 9.12195  | Pd | 4.20120  | 5.63739 | 4.58398 |
| Pd | -4.18932 | 7.27364 | 6.97652  | Pd | 7.00524  | 5.65509 | 4.59973 |
| Pd | -1.40996 | 7.26020 | 6.94707  |    |          |         |         |

*Pd<sub>3</sub> line\_T+B+B*

|   |          |         |          |    |          |         |         |
|---|----------|---------|----------|----|----------|---------|---------|
| C | 7.51499  | 2.32161 | 8.97744  | Pd | -1.36937 | 7.27168 | 6.94915 |
| C | 2.64182  | 3.11449 | 10.92494 | Pd | 5.60075  | 0.02237 | 6.84713 |
| C | 2.75241  | 5.40713 | 8.99533  | Pd | 8.41570  | 0.01619 | 6.83889 |
| C | 5.36950  | 4.27331 | 11.03599 | Pd | 9.74749  | 2.41969 | 6.71646 |
| C | 8.27530  | 4.39508 | 10.96534 | Pd | 1.37122  | 2.38895 | 6.98381 |
| C | -0.34462 | 3.01268 | 8.21493  | Pd | 4.19891  | 2.44417 | 6.95081 |
| C | 5.60221  | 6.59654 | 8.19212  | Pd | 7.01803  | 2.46032 | 7.06264 |
| C | 4.61160  | 1.00591 | 8.28177  | Pd | -2.75954 | 4.86486 | 7.03536 |
| C | 1.36332  | 0.74960 | 8.27015  | Pd | 0.03099  | 4.79355 | 7.01747 |
| C | -1.34018 | 5.63913 | 8.29582  | Pd | 2.81810  | 4.91781 | 7.03987 |
| O | 7.95406  | 1.55567 | 9.74870  | Pd | 5.60881  | 4.87183 | 7.05922 |
| O | 2.62465  | 2.56872 | 11.94994 | Pd | 1.41515  | 0.81576 | 4.55456 |
| O | 2.71244  | 6.38631 | 9.66703  | Pd | 4.19545  | 0.82378 | 4.55813 |
| O | 5.35991  | 4.52939 | 12.17368 | Pd | 7.01115  | 0.83785 | 4.59253 |
| O | -2.31833 | 4.32196 | 11.93487 | Pd | 9.80268  | 0.79158 | 4.50758 |
| O | -0.53758 | 2.85346 | 9.40509  | Pd | 0.02168  | 3.24836 | 4.53656 |
| O | 5.67344  | 6.72617 | 9.37746  | Pd | 2.79681  | 3.24882 | 4.64724 |

|    |          |         |         |    |          |         |         |
|----|----------|---------|---------|----|----------|---------|---------|
| O  | 4.59389  | 0.96675 | 9.46807 | Pd | 5.60478  | 3.24408 | 4.64709 |
| O  | 1.34187  | 0.71324 | 9.45226 | Pd | 8.36798  | 3.25885 | 4.56003 |
| O  | -1.21199 | 5.70677 | 9.47633 | Pd | -1.39523 | 5.64992 | 4.59600 |
| Pd | 1.48980  | 3.86511 | 9.40278 | Pd | 1.41007  | 5.65586 | 4.61597 |
| Pd | 4.12092  | 3.77240 | 9.52279 | Pd | 4.19487  | 5.63152 | 4.59866 |
| Pd | 6.88166  | 4.19714 | 9.52232 | Pd | 6.99237  | 5.63371 | 4.59305 |
| Pd | -4.17053 | 7.27025 | 6.82747 |    |          |         |         |

*Pd<sub>3</sub>line\_T+T+B*

|    |          |         |          |    |          |         |         |
|----|----------|---------|----------|----|----------|---------|---------|
| C  | 7.40057  | 2.10964 | 10.15892 | Pd | -1.40890 | 7.25210 | 6.91208 |
| C  | 2.97005  | 3.22105 | 10.84315 | Pd | 5.58398  | 0.01937 | 6.82954 |
| C  | 2.80517  | 5.46019 | 8.87437  | Pd | 8.40128  | 0.02597 | 6.83074 |
| C  | 5.48808  | 4.88017 | 10.78829 | Pd | 9.74276  | 2.41778 | 6.80356 |
| C  | 8.35242  | 4.72392 | 11.10979 | Pd | 1.37212  | 2.38962 | 6.96167 |
| C  | -0.28690 | 3.08615 | 8.24620  | Pd | 4.19438  | 2.43878 | 6.92638 |
| C  | 9.70738  | 0.01989 | 8.32162  | Pd | 6.99411  | 2.45975 | 6.94667 |
| C  | 4.72560  | 1.07872 | 8.28535  | Pd | -2.78675 | 4.83958 | 7.07396 |
| C  | 1.43144  | 0.79510 | 8.28133  | Pd | 0.02222  | 4.79372 | 6.99989 |
| C  | -1.35233 | 5.65591 | 8.28595  | Pd | 2.83520  | 4.91472 | 6.94737 |
| O  | 7.50746  | 1.36062 | 11.02807 | Pd | 5.64895  | 4.83875 | 6.97966 |
| O  | 3.03514  | 2.69708 | 11.87725 | Pd | 1.39217  | 0.80230 | 4.56692 |
| O  | 2.71222  | 6.46270 | 9.50811  | Pd | 4.18084  | 0.80997 | 4.54818 |
| O  | 5.31451  | 5.42114 | 11.80887 | Pd | 7.00793  | 0.81807 | 4.57299 |
| O  | -2.32270 | 4.91314 | 12.11265 | Pd | 9.80778  | 0.79967 | 4.52464 |
| O  | -0.44031 | 2.95017 | 9.44366  | Pd | 0.00934  | 3.23924 | 4.54912 |
| O  | 9.70269  | 0.14987 | 9.48934  | Pd | 2.78882  | 3.23811 | 4.62499 |
| O  | 4.65477  | 0.99606 | 9.46244  | Pd | 5.59308  | 3.23489 | 4.59512 |
| O  | 1.44830  | 0.79176 | 9.46560  | Pd | 8.37672  | 3.24946 | 4.58129 |
| O  | -1.18175 | 5.74816 | 9.45831  | Pd | -1.40289 | 5.64117 | 4.59074 |
| Pd | 1.67950  | 3.83440 | 9.36801  | Pd | 1.40002  | 5.64921 | 4.60130 |
| Pd | 4.32185  | 3.98719 | 9.35917  | Pd | 4.20199  | 5.63408 | 4.58081 |
| Pd | 7.04291  | 4.03017 | 9.75057  | Pd | 6.99474  | 5.64064 | 4.61541 |
| Pd | 6.99822  | 7.25202 | 6.93765  |    |          |         |         |

*Pd(865)\_B+H*

|   |         |          |          |    |         |          |         |
|---|---------|----------|----------|----|---------|----------|---------|
| C | 7.10290 | 2.73480  | 10.05612 | Pd | 4.81460 | 5.45372  | 6.48928 |
| C | 5.14440 | 5.28714  | 8.43617  | Pd | 6.84833 | 2.58459  | 8.15992 |
| C | 1.52871 | 4.69524  | 7.60384  | Pd | 3.64100 | 10.81078 | 7.48827 |
| C | 2.68936 | 7.41202  | 8.23619  | Pd | 4.72258 | 0.78544  | 7.88590 |
| C | 2.52494 | 11.65561 | 9.08625  | Pd | 6.85941 | 7.28028  | 6.72987 |
| C | 4.62422 | 9.44280  | 8.69057  | Pd | 1.54939 | 8.96412  | 7.23154 |
| C | 7.36766 | 8.26620  | 8.43594  | Pd | 2.07892 | 1.62346  | 8.08549 |
| C | 6.91404 | 11.37783 | 9.09285  | Pd | 4.20987 | 8.15491  | 7.02106 |



|    |         |          |          |    |         |          |         |
|----|---------|----------|----------|----|---------|----------|---------|
| C  | 3.65659 | 1.80639  | 9.45573  | Pd | 8.40771 | 11.70198 | 7.67225 |
| O  | 7.21926 | 2.84861  | 11.19543 | Pd | 3.15098 | 0.94432  | 5.48136 |
| O  | 5.49912 | 5.82426  | 9.41780  | Pd | 5.24035 | 7.35900  | 4.46106 |
| O  | 1.56309 | 4.61786  | 8.79927  | Pd | 7.39776 | 4.54859  | 6.27541 |
| O  | 2.69850 | 7.16161  | 9.38707  | Pd | 5.78612 | 0.02289  | 5.33379 |
| O  | 2.52961 | 11.43353 | 10.24353 | Pd | 0.51133 | 1.81343  | 5.67455 |
| O  | 4.61122 | 9.23298  | 9.84723  | Pd | 7.90023 | 6.47175  | 4.24388 |
| O  | 7.36853 | 8.01684  | 9.58682  | Pd | 2.60473 | 8.29210  | 4.59412 |
| O  | 6.92207 | 11.18830 | 10.25271 | Pd | 2.59234 | 3.63334  | 6.14148 |
| O  | 3.67859 | 1.71165  | 10.63258 | Pd | 4.73294 | 10.06705 | 4.96975 |
| Pd | 4.25613 | 3.46956  | 8.37067  | Pd | 5.29665 | 2.73059  | 5.81905 |
| Pd | 2.13567 | 6.37002  | 6.52415  | Pd | 7.36186 | 9.18751  | 4.79219 |
| Pd | 6.31407 | 9.91597  | 7.46127  | Pd | 2.07685 | 10.95331 | 5.14539 |

*Pd(865)\_B+B*

|    |         |          |          |    |         |          |         |
|----|---------|----------|----------|----|---------|----------|---------|
| C  | 5.80418 | 3.66052  | 9.67504  | Pd | 4.72774 | 5.40728  | 6.47108 |
| C  | 2.82134 | 2.89548  | 9.80890  | Pd | 6.84642 | 2.57145  | 8.23278 |
| C  | 1.33401 | 4.67885  | 7.58499  | Pd | 3.67439 | 10.76800 | 7.65824 |
| C  | 3.83505 | 6.39125  | 8.01425  | Pd | 4.77334 | 0.73675  | 7.87715 |
| C  | 1.92973 | 10.19281 | 8.87669  | Pd | 6.86033 | 7.22578  | 6.71257 |
| C  | 5.04906 | 9.11045  | 8.62062  | Pd | 1.52761 | 9.01066  | 7.20719 |
| C  | 7.92176 | 7.61149  | 8.35238  | Pd | 2.15487 | 1.64549  | 8.24844 |
| C  | 6.42570 | 0.75533  | 9.26931  | Pd | 4.22979 | 8.12436  | 6.97338 |
| C  | 3.29762 | 0.16818  | 9.24496  | Pd | 1.06428 | 11.69615 | 7.68903 |
| O  | 6.07939 | 4.08274  | 10.72419 | Pd | 3.11391 | 0.92236  | 5.52966 |
| O  | 2.54191 | 3.03545  | 10.92862 | Pd | 5.26751 | 7.34937  | 4.44170 |
| O  | 1.19562 | 4.64036  | 8.77702  | Pd | 7.30511 | 4.50002  | 6.20237 |
| O  | 3.78000 | 6.18421  | 9.18247  | Pd | 5.77720 | 0.02001  | 5.30569 |
| O  | 1.91611 | 9.96999  | 10.03112 | Pd | 0.48537 | 1.79507  | 5.71288 |
| O  | 5.10811 | 8.89556  | 9.77511  | Pd | 7.92739 | 6.46617  | 4.23675 |
| O  | 7.87263 | 7.35360  | 9.49400  | Pd | 2.60918 | 8.26707  | 4.62763 |
| O  | 6.41659 | 0.58535  | 10.43620 | Pd | 2.54149 | 3.60895  | 6.20096 |
| O  | 4.39806 | 11.78430 | 10.40359 | Pd | 4.69995 | 10.05707 | 4.95133 |
| Pd | 4.23561 | 3.44777  | 8.41822  | Pd | 5.22023 | 2.72111  | 5.81976 |
| Pd | 2.10675 | 6.33606  | 6.61701  | Pd | 7.37716 | 9.17383  | 4.75861 |
| Pd | 6.28951 | 9.91117  | 7.25110  | Pd | 2.08038 | 10.94257 | 5.16994 |

*Pd(865)\_T+B*

|   |         |          |          |    |         |          |         |
|---|---------|----------|----------|----|---------|----------|---------|
| C | 3.96950 | 3.63384  | 10.44757 | Pd | 4.82475 | 5.40929  | 6.51447 |
| C | 5.33289 | 5.14312  | 8.42852  | Pd | 6.88392 | 2.55482  | 8.08421 |
| C | 1.43923 | 4.61774  | 7.60342  | Pd | 3.68234 | 10.77873 | 7.57522 |
| C | 2.95573 | 7.15586  | 8.29049  | Pd | 4.74960 | 0.74204  | 7.91623 |
| C | 2.00779 | 10.38057 | 8.88434  | Pd | 6.90128 | 7.23926  | 6.70460 |

|    |         |          |          |    |         |          |         |
|----|---------|----------|----------|----|---------|----------|---------|
| C  | 4.86895 | 9.53698  | 8.74286  | Pd | 1.56954 | 9.02411  | 7.24444 |
| C  | 7.40412 | 8.21891  | 8.40501  | Pd | 2.12926 | 1.63142  | 7.97298 |
| C  | 6.45810 | 0.97822  | 9.26644  | Pd | 4.21792 | 8.10799  | 7.03311 |
| C  | 3.29955 | 0.85431  | 9.36985  | Pd | 8.43145 | 11.70801 | 7.68052 |
| O  | 3.91553 | 3.82603  | 11.57664 | Pd | 3.16711 | 0.89930  | 5.47754 |
| O  | 5.89461 | 5.71784  | 9.28853  | Pd | 5.25270 | 7.34134  | 4.46314 |
| O  | 1.33474 | 4.44968  | 8.79026  | Pd | 7.38244 | 4.51008  | 6.20239 |
| O  | 2.91623 | 6.96312  | 9.44752  | Pd | 5.78340 | 0.01146  | 5.34360 |
| O  | 2.01836 | 10.17611 | 10.04222 | Pd | 0.52699 | 1.78893  | 5.63053 |
| O  | 4.86520 | 9.30457  | 9.89470  | Pd | 7.92264 | 6.47031  | 4.24189 |
| O  | 7.42905 | 7.98374  | 9.55769  | Pd | 2.60435 | 8.26866  | 4.62236 |
| O  | 6.48463 | 0.85570  | 10.44093 | Pd | 2.59665 | 3.64817  | 6.14530 |
| O  | 3.24293 | 0.61566  | 10.51873 | Pd | 4.73171 | 10.03070 | 4.96150 |
| Pd | 4.25259 | 3.45560  | 8.49690  | Pd | 5.22602 | 2.72323  | 5.83780 |
| Pd | 2.12977 | 6.34041  | 6.61058  | Pd | 7.37676 | 9.17929  | 4.77885 |
| Pd | 6.32737 | 9.84032  | 7.35729  | Pd | 2.09445 | 10.94336 | 5.15125 |

*Pd(865)\_T+H*

|    |         |          |          |    |         |          |         |
|----|---------|----------|----------|----|---------|----------|---------|
| C  | 7.32189 | 2.56391  | 10.04559 | Pd | 4.76663 | 5.41873  | 6.36422 |
| C  | 4.68408 | 4.78346  | 9.86616  | Pd | 6.89584 | 2.55207  | 8.17669 |
| C  | 1.47483 | 4.68784  | 7.61822  | Pd | 3.64822 | 10.78641 | 7.48394 |
| C  | 2.70938 | 7.35700  | 8.24404  | Pd | 4.73898 | 0.80615  | 7.87099 |
| C  | 2.56398 | 11.65108 | 9.07745  | Pd | 6.80846 | 7.22108  | 6.73452 |
| C  | 4.61843 | 9.41393  | 8.69268  | Pd | 1.52327 | 8.91848  | 7.26250 |
| C  | 7.33569 | 8.16395  | 8.43641  | Pd | 2.12251 | 1.62719  | 8.09321 |
| C  | 6.90710 | 11.34465 | 9.06665  | Pd | 4.20721 | 8.10927  | 7.03282 |
| C  | 3.72055 | 1.90451  | 9.44960  | Pd | 8.42396 | 11.68538 | 7.66910 |
| O  | 7.50437 | 2.62659  | 11.18078 | Pd | 3.14318 | 0.93846  | 5.48315 |
| O  | 4.93185 | 5.38380  | 10.81337 | Pd | 5.24052 | 7.38029  | 4.44419 |
| O  | 1.45622 | 4.63511  | 8.81274  | Pd | 7.36283 | 4.53339  | 6.27504 |
| O  | 2.71137 | 7.11195  | 9.39708  | Pd | 5.78277 | 0.02831  | 5.33741 |
| O  | 2.55783 | 11.42484 | 10.23441 | Pd | 0.51242 | 1.80962  | 5.66622 |
| O  | 4.59854 | 9.20360  | 9.84965  | Pd | 7.89589 | 6.47042  | 4.24684 |
| O  | 7.29812 | 7.87361  | 9.57864  | Pd | 2.59902 | 8.28775  | 4.60719 |
| O  | 6.91445 | 11.17218 | 10.23064 | Pd | 2.59243 | 3.62533  | 6.16821 |
| O  | 3.72025 | 1.72061  | 10.61557 | Pd | 4.73435 | 10.06605 | 4.97678 |
| Pd | 4.35628 | 3.58670  | 8.36549  | Pd | 5.27325 | 2.72857  | 5.85999 |
| Pd | 2.12187 | 6.34155  | 6.53671  | Pd | 7.36107 | 9.18434  | 4.81081 |
| Pd | 6.31535 | 9.89031  | 7.47983  | Pd | 2.07481 | 10.94221 | 5.14798 |

*Pd(865)\_T+B+H*

|   |         |         |          |    |         |         |         |
|---|---------|---------|----------|----|---------|---------|---------|
| C | 7.10110 | 2.57926 | 10.04934 | Pd | 6.32050 | 9.89765 | 7.43555 |
| C | 3.62072 | 4.24779 | 10.47748 | Pd | 4.81433 | 5.38372 | 6.53059 |

|    |         |          |          |    |         |          |         |
|----|---------|----------|----------|----|---------|----------|---------|
| C  | 5.33910 | 5.19597  | 8.42773  | Pd | 6.85477 | 2.55131  | 8.14765 |
| C  | 1.45235 | 4.67930  | 7.60521  | Pd | 3.65691 | 10.77439 | 7.47049 |
| C  | 2.74462 | 7.32475  | 8.21286  | Pd | 4.73220 | 0.79604  | 7.86264 |
| C  | 2.50488 | 11.55243 | 9.05942  | Pd | 6.86841 | 7.25253  | 6.74604 |
| C  | 4.63748 | 9.38813  | 8.66700  | Pd | 1.57335 | 8.93448  | 7.20151 |
| C  | 7.43271 | 8.28568  | 8.43062  | Pd | 2.08702 | 1.56995  | 8.12471 |
| C  | 6.91062 | 11.31891 | 9.04192  | Pd | 4.22375 | 8.11181  | 7.00101 |
| C  | 3.66270 | 1.58216  | 9.50959  | Pd | 8.41192 | 11.67679 | 7.63320 |
| O  | 7.22494 | 2.62980  | 11.19389 | Pd | 3.13640 | 0.93230  | 5.48287 |
| O  | 3.37229 | 4.58668  | 11.54142 | Pd | 5.24526 | 7.33822  | 4.47016 |
| O  | 5.92876 | 5.80419  | 9.24464  | Pd | 7.38586 | 4.50997  | 6.21914 |
| O  | 1.35104 | 4.64840  | 8.79732  | Pd | 5.77507 | 0.01541  | 5.31826 |
| O  | 2.75790 | 7.07191  | 9.36449  | Pd | 0.50154 | 1.79949  | 5.66513 |
| O  | 2.47715 | 11.29409 | 10.20846 | Pd | 7.90218 | 6.46865  | 4.24121 |
| O  | 4.62746 | 9.17787  | 9.82377  | Pd | 2.60687 | 8.27539  | 4.58927 |
| O  | 7.44932 | 8.08762  | 9.59116  | Pd | 2.59720 | 3.59634  | 6.22006 |
| O  | 6.93460 | 11.13176 | 10.20237 | Pd | 4.73122 | 10.05065 | 4.95935 |
| O  | 3.67123 | 1.24919  | 10.64326 | Pd | 5.25459 | 2.72382  | 5.86215 |
| Pd | 4.21066 | 3.49314  | 8.69965  | Pd | 7.35877 | 9.17021  | 4.79164 |
| Pd | 2.13930 | 6.32620  | 6.51995  | Pd | 2.07538 | 10.93830 | 5.12874 |
